# Supplementary material for: Composite silica nanospheres covalently anchored with gold nanoparticles at the outer periphery of thermoresponsive polymer brushes
Source: Royal Society of Chemistry journal article supplement (doi:10.1039/c2jm15530c), 2012-01-01
Supplement: c2jm15530c.pdf [file c2jm15530c.pdf]

i

**Composite Silica Nanospheres Covalently Anchored with Gold  
Nanoparticles at the Outer Periphery of Thermoresponsive Polymer  
Brushes**

**Tao Wu, Qianqian Zhang, Jinming Hu, Guoying Zhang,\* and Shiyong Liu\***

*CAS Key Laboratory of Soft Matter Chemistry, Department of Polymer Science and  
Engineering, Hefei National Laboratory for Physical Sciences at the Microscale,  
University of Science and Technology of China, Hefei, Anhui 230026, China*

\* To whom correspondence should be addressed.

Email: sliu@ustc.edu.cn, gyzhang@ustc.edu.cn

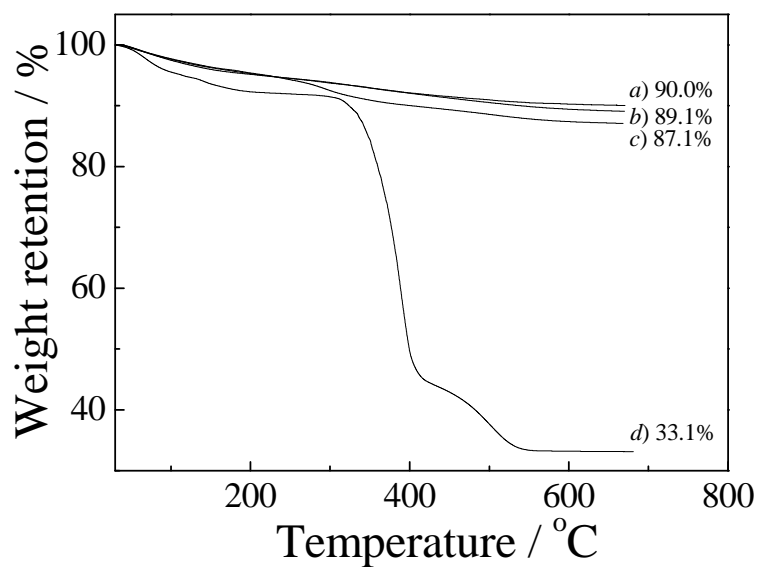

**Figure S1.** Thermogravimetric analysis (TGA) of (a) bare silica nanoparticles, (b) amine-functionalized silica nanoparticles, (c) 2-bromoisobutyrate-functionalized silica nanoparticles, and (d) hybrid silica nanoparticles coated with PNIPAM brushes. TGA analysis was performed in air at a heating rate of 10 °C/min.

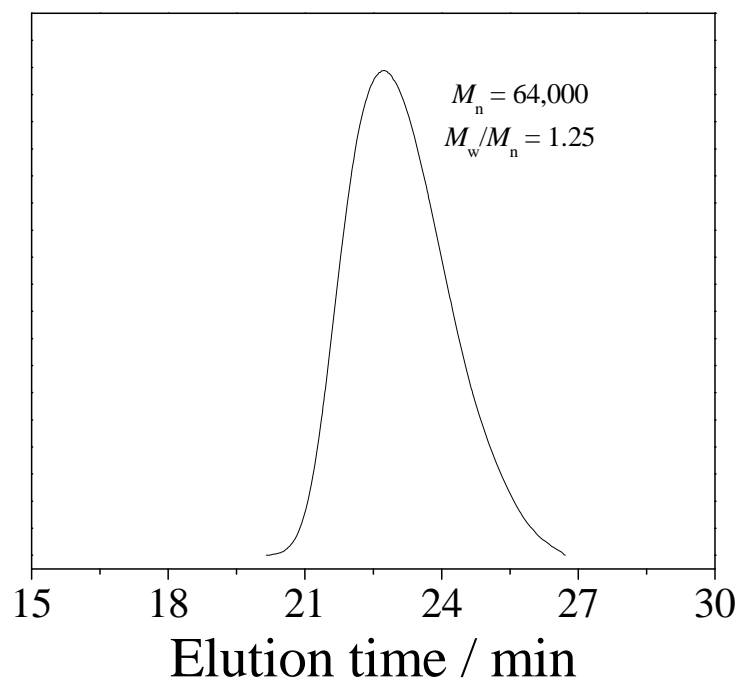

**Figure S2.** GPC trace of PNIPAM brushes cleaved from hybrid silica nanoparticles via etching with hydrofluoric acid.
